# Supplementary material for: Preclinical safety studies of human embryonic stem cell‐derived retinal pigment epithelial cells for the treatment of age‐related macular degeneration
Source: PubMed Central journal article supplement (PMC7381808; doi:10.1002/sctm.19-0396), 2020-04-22
Supplement: SCT3-9-936-s001.pdf [file SCT3-9-936-s001.pdf]

## **SUPPLEMENTAL INFORMATION**

**Preclinical safety studies of human embryonic stem cell-derived retinal pigment epithelial cells for the treatment of age-related macular degeneration**

**Petrus-Reurer et al.**

**Supplemental Figures S1 – S5**

**Supplemental Tables S1 – S7**

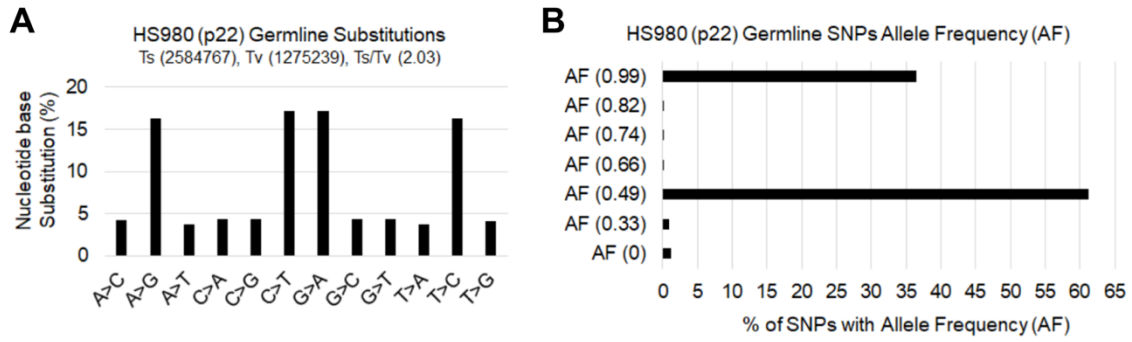

**SUPPLEMENTAL FIGURE S1. Annotation of germline SNVs.**

**(A)** Bar charts showing the relative percentage of mutational subtypes for the germline SNVs in HS980 (p22) sample. **(B)** Bar charts showing the relative percentage of germline SNP allele frequency for the HS980 (p22) sample.

**A**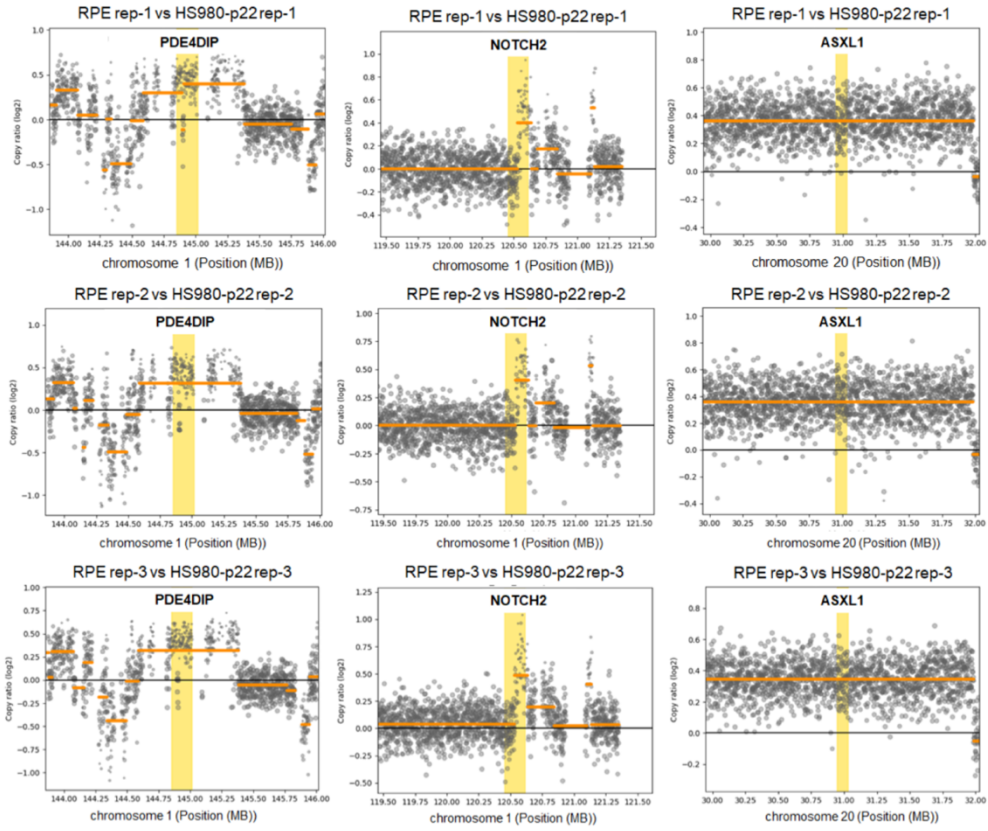**B**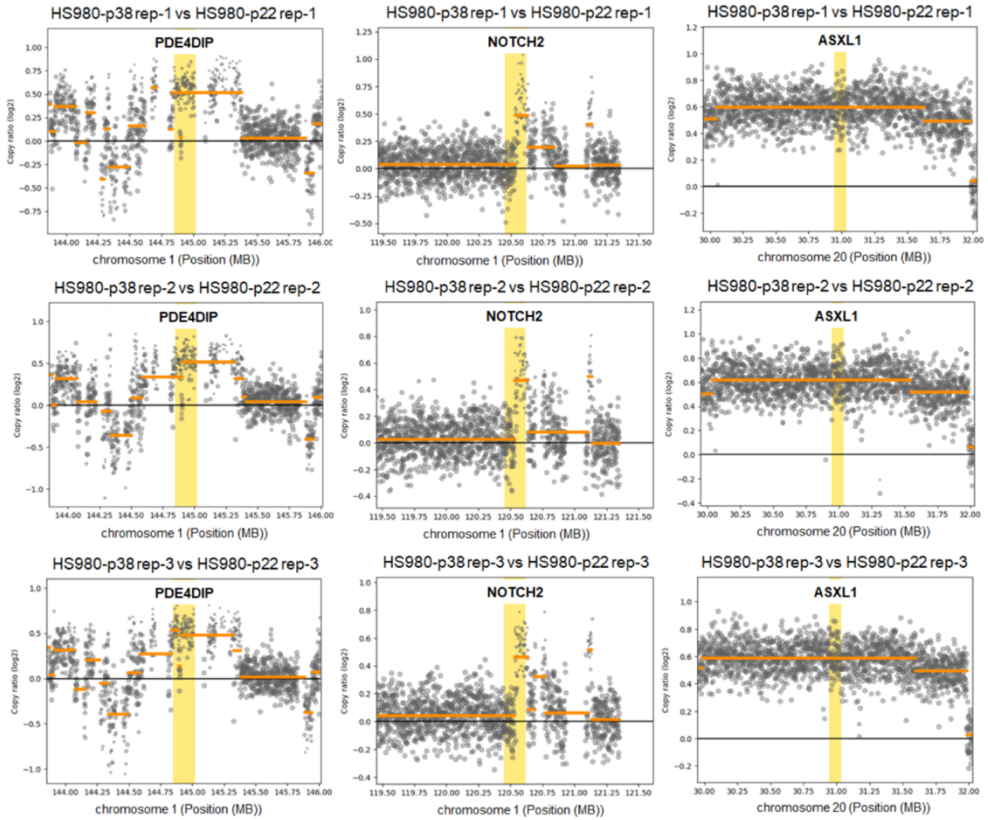

**SUPPLEMENTAL FIGURE S2. Copy number profile for cancer-driver genes (*PDE4DIP*, *NOTCH2* and *ASXL1*) in hESC-RPE and HS980 (p38) samples.**

**(A)** Plots showing copy number ratio by CNVkit for cancer-driver genes *PDE4DIP*, *NOTCH2* and *ASXL1* for hESC-RPE samples. X-axis represents log<sub>2</sub> copy ratio of hESC-RPE samples compared with their respective HS980 (p22) control samples and Y-axis represents genomic position. **(B)** Plots showing copy number ratio by CNVkit for *PDE4DIP*, *NOTCH2* and *ASXL1* genes for HS980 (p38) samples. X-axis represents log<sub>2</sub> copy ratio of HS980 (p38) samples compared with their respective HS980 (p22) control samples and Y-axis represents genomic position.

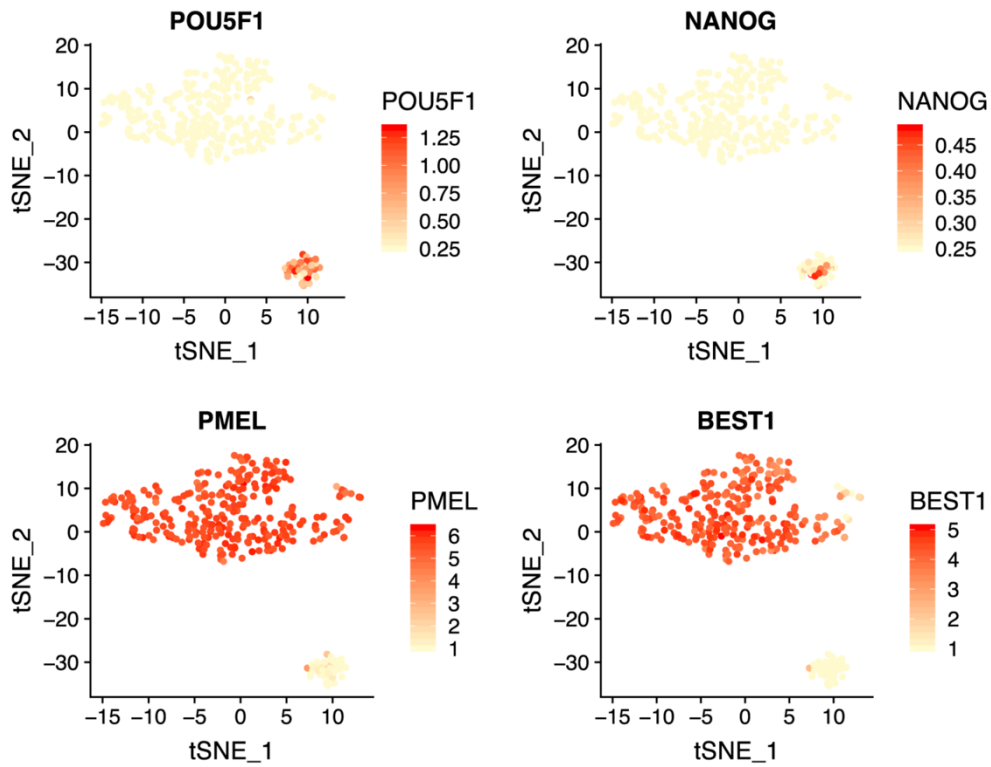

**SUPPLEMENTAL FIGURE S3. Single cell RNA sequencing analysis of hESC-RPE and hESC.**

tSNE plots showing expression of selective hESC and RPE markers in hESC and hESC-RPE cell clusters.

**A**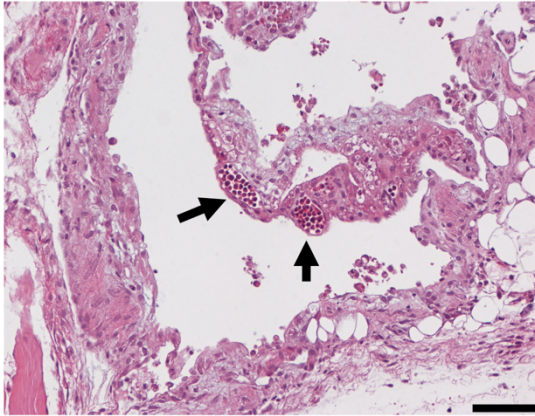**B**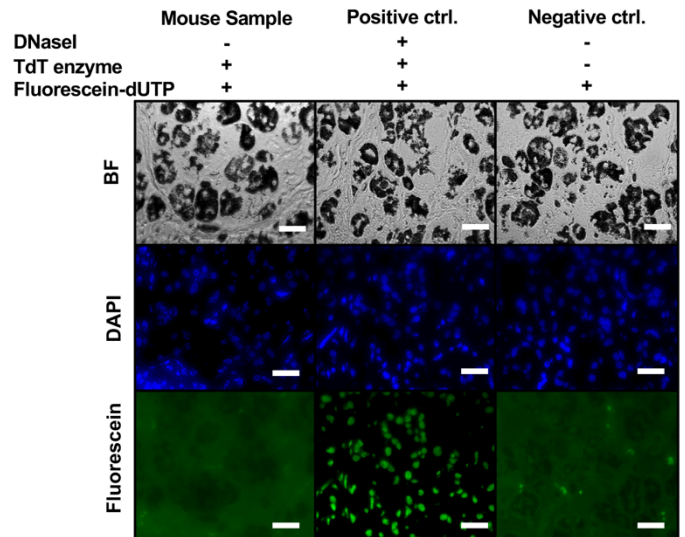**C**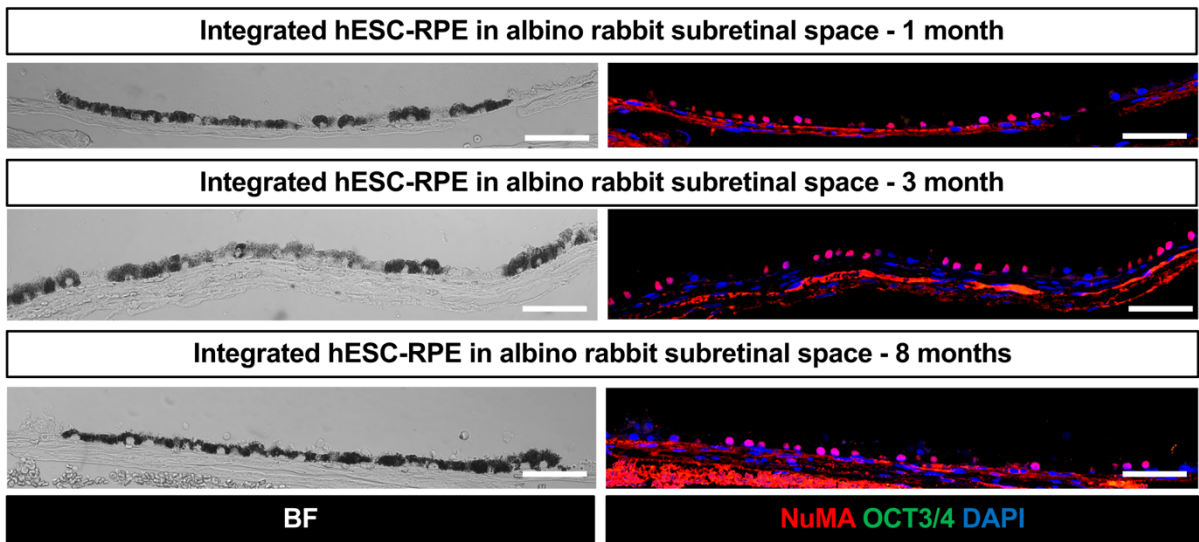**D**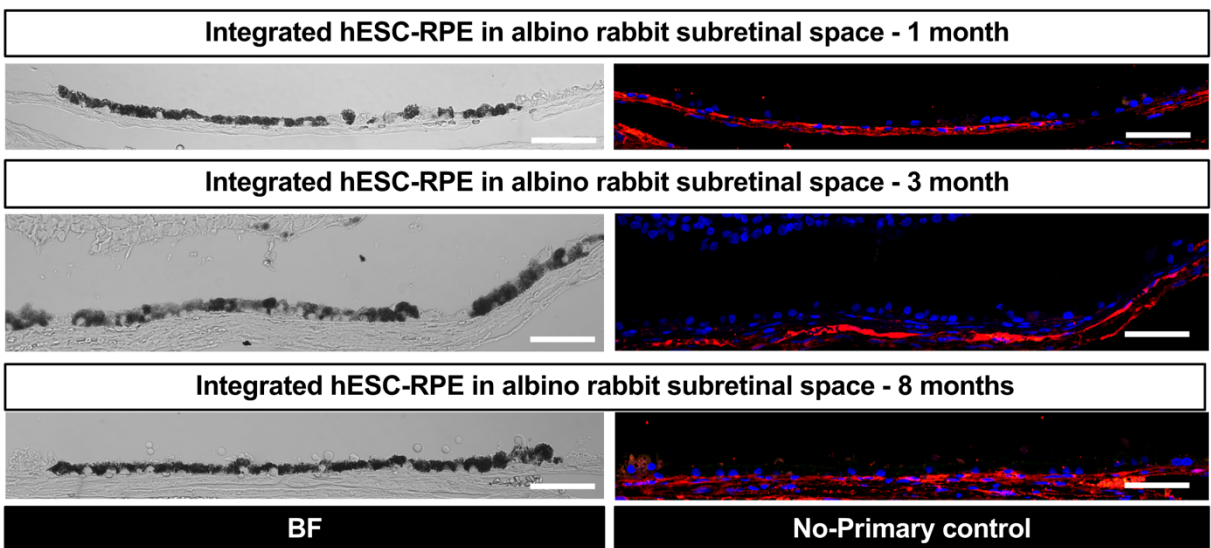

**SUPPLEMENTAL FIGURE S4. Evaluation of hESC-RPE injected subcutaneously into NOG mice or subretinally into albino rabbits.**

**(A)** HE staining image showing dilated vascular profiles densely packed with nucleated cells with an intensely eosinophilic cytoplasm representing primitive hematopoiesis. Cells with hepatoid features border these yolk sac blood islands. **(B)** Representative BF and immunofluorescence images showing TUNEL-negative (alive) collected hESC-RPE cells 7 months after subcutaneous transplantation into NOG mice. **(C)** Representative BF and immunofluorescent images of NuMA and OCT3/4 staining of integrated hESC-RPE in the rabbit subretinal space at 1, 3 and 8 months after transplantation. **(D)** No-primary control stainings of the same specimens showed in Figure S4C.

Scale bars: (A, B) = 100  $\mu\text{m}$ ; (C, D) = 50  $\mu\text{m}$

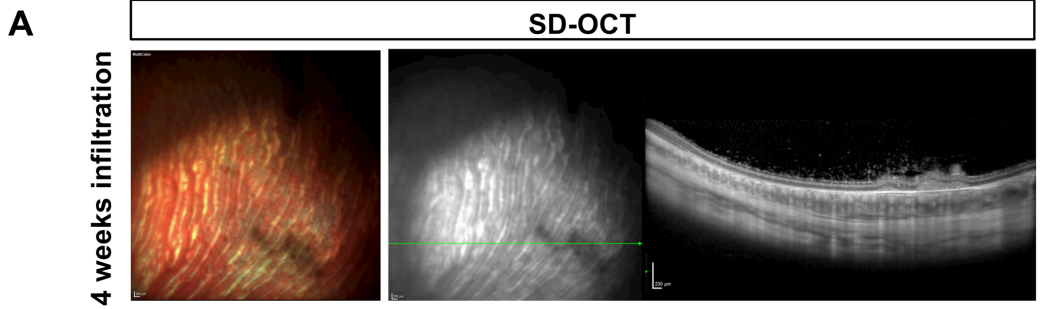

**B**

| Nr hESC       | Cells/mg | Log (Cells/mg) | Ct RPLPO (Human) |
|---------------|----------|----------------|------------------|
| Rb Ki_10      | 0.54     | -0.27          | 36.15            |
| Rb Ki_100     | 5.4      | 0.73           | 32.11            |
| Rb Ki_1000    | 54       | 1.73           | 29.38            |
| Rb Ki_10000   | 540      | 2.73           | 26.70            |
| Rb Ki_100000  | 5400     | 3.73           | 21.61            |
| Rb Ki_1000000 | 54000    | 4.73           | 19.28            |

**C**

| Nr hESC-RPE   | Cells/mg | Log (Cells/mg) | Ct RPLPO (Human) |
|---------------|----------|----------------|------------------|
| Rb Ki_10      | 0.54     | -0.27          | 36.26            |
| Rb Ki_100     | 5.4      | 0.73           | 35.97            |
| Rb Ki_1000    | 54       | 1.73           | 32.14            |
| Rb Ki_10000   | 540      | 2.73           | 29.40            |
| Rb Ki_100000  | 5400     | 3.73           | 24.90            |
| Rb Ki_1000000 | 54000    | 4.73           | 22.19            |

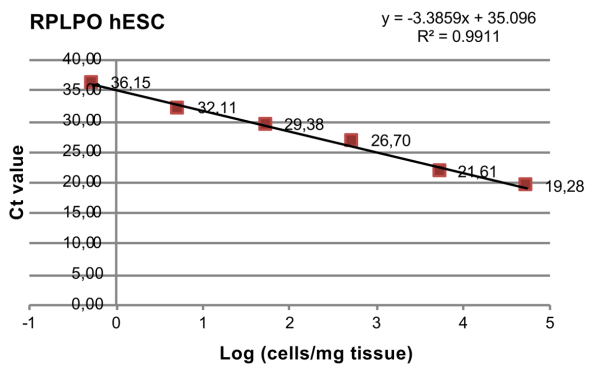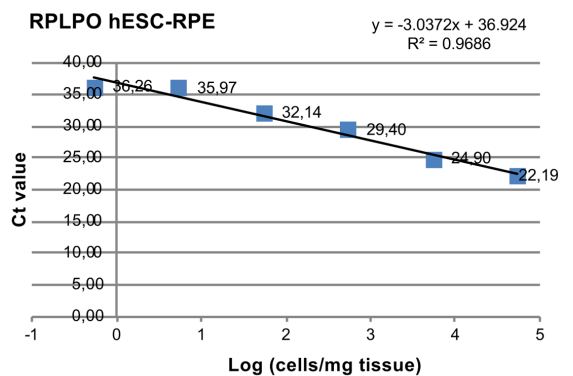

Detection limit: 1 cell in 1.85mg of rabbit tissue

**D**

| Nr hESC         | Cells/mg | Log (Cells/mg) | Ct RPLPO (Human) |
|-----------------|----------|----------------|------------------|
| Ms WT Li_10     | 0.5      | -0.30          | 33.03            |
| Ms WT Li_100    | 5        | 0.69           | 29.16            |
| Ms WT Li_1000   | 50       | 1.69           | 25.31            |
| Ms WT Li_10000  | 500      | 2.69           | 22.15            |
| Ms WT Li_100000 | 5000     | 3.69           | 18.66            |

**E**

| Nr hESC-RPE      | Cells/mg | Log (Cells/mg) | Ct RPLPO (Human) |
|------------------|----------|----------------|------------------|
| Ms WT Li_1       | 0.05     | -1.30          | 34.49            |
| Ms WT Li_10      | 0.5      | -0.30          | 32.13            |
| Ms WT Li_100     | 5        | 0.69           | 28               |
| Ms WT Li_1000    | 50       | 1.69           | 27.72            |
| Ms WT Li_10000   | 500      | 2.69           | 24.55            |
| Ms WT Li_100000  | 5000     | 3.69           | 21.13            |
| Ms WT Li_1000000 | 50000    | 4.69           | 20.36            |

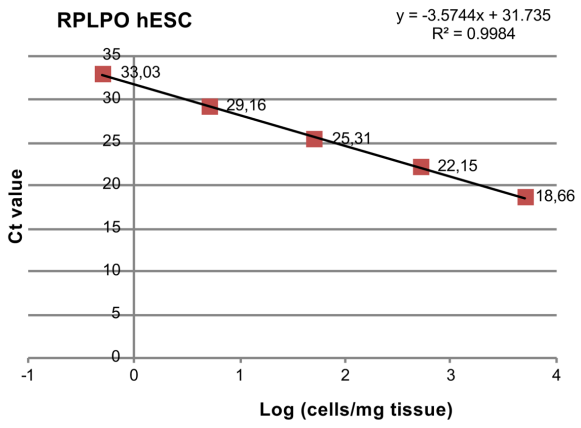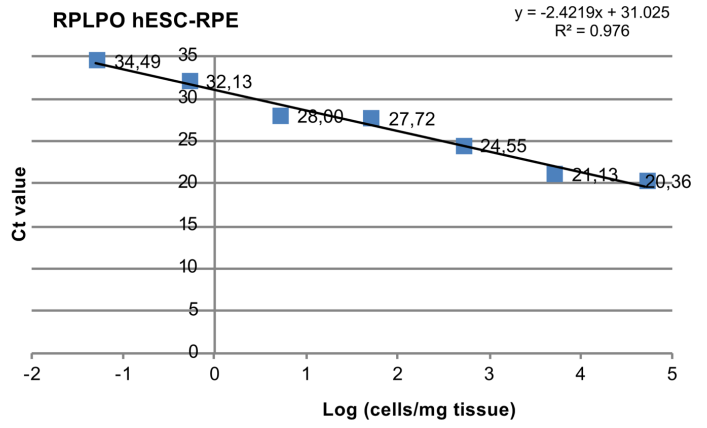

Detection limit: 1 cell in 20mg of mouse tissue



**SUPPLEMENTAL FIGURE S5. hESC and hESC-RPE cell spiking in rabbit and mouse tissues for biodistribution studies.**

**(A)** SD-OCT image showing infiltration in the subretinal space 4 weeks after injection of hESC-RPE cells. **(B)** Detection of RPLPO transcripts by qPCR after serial dilutions of hESC in rabbit (Rb) kidney (Ki) tissue. **(C)** Detection of RPLPO transcripts by qPCR after serial dilutions of hESC-RPE in rabbit kidney tissue. **(D)** Detection of RPLPO transcripts by qPCR after serial dilutions of hESC in wild-type (WT) mouse (Ms) liver (Li) tissue. **(E)** Detection of RPLPO transcripts by qPCR after serial dilutions of hESC-RPE in wild-type mouse liver tissue.

Nr: Number

Scale bars: (A) = 200  $\mu$ m

**Supplemental Table S1. Tumorigenicity studies design. Relation of injected cell type, number of cells and monitoring time in each group of NOG mice.**

| Mice group | Number of mice | Cell type  | Number of cells | Monitoring period |
|------------|----------------|------------|-----------------|-------------------|
| 1          | 10             | hESC       | $1 \times 10^1$ | 4 months          |
| 2          | 10             | hESC       | $1 \times 10^2$ | 4 months          |
| 3          | 10             | hESC       | $1 \times 10^3$ | 4 months          |
| 4          | 10             | hESC       | $1 \times 10^4$ | 4 months          |
| 5          | 10             | hESC       | $1 \times 10^5$ | 4 months          |
| 6          | 10             | hESC       | $1 \times 10^6$ | 4 months          |
| 7          | 10             | 3-week EBs | $1 \times 10^7$ | 7 months          |
| 8          | 10             | 5-week EBs | $1 \times 10^7$ | 7 months          |
| 9          | 10             | hESC-RPE   | $1 \times 10^7$ | 7 months          |

**Supplemental Table S2. Whole-genome DNA sequence alignment statistics for HS980 (p22), hESC-RPE and HS980 (p38) samples.**

| <b>Sample</b>   | <b>Total Reads<br/>(paired-end)</b> | <b>Aligned Reads<br/>(both in pairs)</b> | <b>Coverage<br/>(mean)</b> | <b>Non-duplicated<br/>(read pairs)</b> |
|-----------------|-------------------------------------|------------------------------------------|----------------------------|----------------------------------------|
| HS980 p22 rep-1 | 824,883,240                         | 812,036,402(98.44%)                      | 38.24                      | 352,832,529(84.7%)                     |
| HS980 p22 rep-1 | 839,393,930                         | 832,313,573(99.16%)                      | 39.27                      | 360,164,708(85.3%)                     |
| HS980 p22 rep-1 | 787,107,006                         | 782,885,654(99.46%)                      | 36.91                      | 362,620,161(91.9%)                     |
| hESC-RPE rep-1  | 834,164,276                         | 793,489,002(95.12%)                      | 37.56                      | 364,737,787(83.6%)                     |
| hESC-RPE rep-2  | 768,238,398                         | 764,986,043(99.58%)                      | 36.26                      | 354,434,223(92.1%)                     |
| hESC-RPE rep-3  | 836,031,077                         | 830,641,424(99.36%)                      | 39.12                      | 376,953,431(89.1%)                     |
| HS980 p38 rep-1 | 831,868,835                         | 824,536,555(99.12%)                      | 38.96                      | 335,881,565(80.3%)                     |
| HS980 p38 rep-2 | 788,437,294                         | 783,554,320(99.38%)                      | 37.06                      | 362,663,677(91.7%)                     |
| HS980 p38 rep-3 | 775,465,729                         | 771,450,994(99.48%)                      | 36.63                      | 359,163,976(92.4%)                     |

**Supplemental Table S3. HS980 (p22) Germline SNV overlapping to ClinVar Database.**

# HS980 p22 combined all three replicates germline SNVs

# SNVs overlapping to ClinVar clinical Databases (release 29th October 2017)

# SNVs reported as CLNSIG (clinical significance) ="Pathogenic"

# CLNDN; Description="ClinVar's preferred disease name for the concept specified by disease identifiers in CLNDISDB"

# GMAF = Global Minor Allele Frequency

# Common Variant (minor allele frequency (GMAF) of >= 0.01 in at least one 1000 Genomes Phase III major population with at least two individuals from different families having same minor allele)

| Chr_No | Position  | dbSNP_rs-ID | ClinVar-ID | REF | ALT | GMAF   | Population Status | Gene-ID    | CLNSIG            | CLNDN                                      |
|--------|-----------|-------------|------------|-----|-----|--------|-------------------|------------|-------------------|--------------------------------------------|
| chr1   | 55504650  | rs2479409   | 440703     | G   | A   | 0.3986 | Common Variant    | PCSK9      | Benign/Pathogenic | Familial_hypercholesterolemia              |
| chr1   | 198796120 | rs12406470  | 427753     | C   | T   | 0.4816 | Common Variant    | MIR181A1HG | Pathogenic        | Acute_myeloid_leukemia_with_maturation     |
| chr1   | 198867678 | rs60639710  | 427754     | G   | T   | 0.2043 | Common Variant    | MIR181A1HG | Pathogenic        | Acute_myeloid_leukemia_with_maturation     |
| chr1   | 198868084 | rs10800597  | 427755     | G   | A   | 0.2045 | Common Variant    | MIR181A1HG | Pathogenic        | Acute_myeloid_leukemia_with_maturation     |
| chr1   | 198869514 | rs10800598  | 427756     | T   | C   | 0.1799 | Common Variant    | MIR181A1HG | Pathogenic        | Acute_myeloid_leukemia_with_maturation     |
| chr4   | 6295693   | rs6446482   | 4528       | C   | G   | 0.2788 | Common Variant    | WFS1       | Pathogenic        | Diabetes_mellitus,_noninsulin-dependent    |
| chr4   | 187158034 | rs3733402   | 12037      | G   | A   | 0.3954 | Common Variant    | KLKB1      | Pathogenic        | Prekallikrein_deficiency                   |
| chr5   | 176520243 | rs351855    | 16326      | G   | A   | 0.2995 | Common Variant    | FGFR4      | Pathogenic        | Cancer_progression_and_tumor_cell_motility |
| chr8   | 11606312  | rs3735819   | 433016     | T   | C   | 0.1284 | Common Variant    | GATA4      | Pathogenic        | Congenital_heart_disease                   |
| chr8   | 11606364  | rs10503425  | 433017     | G   | C   | 0.0493 | Common Variant    | GATA4      | Pathogenic        | Congenital_heart_disease                   |
| chr8   | 11614769  | rs12156163  | 433023     | C   | T   | 0.1142 | Common Variant    | GATA4      | Pathogenic        | Congenital_heart_disease                   |
| chr8   | 11615695  | rs745379    | 433015     | A   | G   | 0.2702 | Common Variant    | GATA4      | Pathogenic        | Congenital_heart_disease                   |
| chr8   | 11616836  | rs804290    | 433024     | G   | A   | 0.117  | Common Variant    | GATA4      | Pathogenic        | Congenital_heart_disease                   |
| chr8   | 11617240  | rs12458     | 433026     | A   | T   | 0.4    | Common Variant    | GATA4      | Pathogenic        | Congenital_heart_disease                   |
| chr10  | 54531235  | rs1800450   | 14350      | C   | T   | 0.122  | Common Variant    | MBL2       | Pathogenic        | Mannose-binding_protein_deficiency         |
| chr11  | 48145375  | rs1566734   | 8690       | A   | C   | 0.1899 | Common Variant    | PTPRJ      | Pathogenic        | Carcinoma_of_colon                         |
| chr16  | 16291858  | rs12929920  | 433383     | G   | C   | 0.2686 | Common Variant    | ABCC6      | Benign/Pathogenic | Pseudoxanthoma_elasticum                   |
| chr16  | 16291871  | rs9940089   | 433382     | G   | C   | 0.2121 | Common Variant    | ABCC6      | Benign/Pathogenic | Pseudoxanthoma_elasticum                   |
| chr17  | 32579788  | rs1024611   | 14207      | A   | G   | 0.3636 | Common Variant    | CCL2       | Pathogenic        | Coronary_artery_disease                    |
| chr20  | 23618427  | rs1064039   | 5635       | C   | T   | 0.2123 | Common Variant    | CST3       | Pathogenic        | Age-related_macular_degeneration_11        |

Highlighted in grey: genes with some clinical relevance reported for AMD in ClinVar

**Supplemental Table S4A. HS980 (p22) Germline SNV overlapping to COSMIC Cancer Gene Census.**

# HS980 p22 Germline SNVs common to three replicates  
 # SNVs reported in COSMIC database (Catalog of Somatic Mutation in Cancer - release v83; Coding; 07-11-2017)  
 # SNVs with "FATHMM" prediction as "Pathogenic"  
**# SNVs within Cancer Driver Genes (COSMIC Cancer Gene Census)**  
 # GMAF in population = Global Minor Allele Frequency  
 # Common Variant (minor allele frequency (GMAF) of  $\geq 0.01$  in at least one 1000 Genomes Phase III major population)

| Chr_No | Position  | dbSNP_rs-ID | COSMIC-ID   | REF | ALT | GMAF          | Population Status | FATHMM SCORE | Gene-ID  | BASE CHANGE | AA CHANGE | Substitution Type |
|--------|-----------|-------------|-------------|-----|-----|---------------|-------------------|--------------|----------|-------------|-----------|-------------------|
| chr2   | 29416481  | rs1881420   | COSM1130802 | T   | C   | 0.4151        | Common Variant    | 0.92214      | ALK      | c.4472A>G   | p.K1491R  | Missense          |
| chr2   | 29940529  | rs2246745   | COSM4416269 | A   | T   | 0.4107        | Common Variant    | 0.9054       | ALK      | c.702T>A    | p.P234P   | coding silent     |
| chr2   | 141116447 | rs35546150  | COSM5019952 | G   | T   | 0.0449        | Common Variant    | 0.86876      | LRP1B    | c.11200C>A  | p.Q3734K  | Missense          |
| chr2   | 141274576 | rs4954672   | COSM4001201 | T   | C   | 0.6424        | Common Variant    | 0.93919      | LRP1B    | c.8031A>G   | p.Q2677Q  | coding silent     |
| chr2   | 212587119 | rs77309171  | COSM4583147 | T   | C   | 0.002         | Common Variant    | 0.86171      | ERBB4    | c.882A>G    | p.P294P   | coding silent     |
| chr3   | 37053568  | rs1799977   | COSM1131469 | A   | G   | 0.1296        | Common Variant    | 0.80196      | MLH1     | c.655A>G    | p.I219V   | Missense          |
| chr3   | 128204951 | rs2335052   | COSM445531  | C   | T   | 0.2328        | Common Variant    | 0.91046      | GATA2    | c.490G>A    | p.A164T   | Missense          |
| chr4   | 55152040  | rs2228230   | COSM22413   | C   | T   | 0.2404        | Common Variant    | 0.88315      | PDGFRA   | c.2472C>T   | p.V824V   | coding silent     |
| chr4   | 55979558  | rs2305948   | COSM1131107 | C   | T   | 0.1526        | Common Variant    | 0.96877      | KDR      | c.889G>A    | p.V297I   | Missense          |
| chr4   | 187630590 | rs3733415   | COSM4416272 | G   | A   | 0.2614        | Common Variant    | 0.95514      | FAT1     | c.392C>T    | p.A131V   | Missense          |
| chr5   | 56177443  | rs702689    | COSM4003565 | G   | A   | 0.4764        | Common Variant    | 0.98239      | MAP3K1   | c.1927G>A   | p.D643N   | Missense          |
| chr5   | 56177743  | rs832582    | COSM4416191 | G   | A   | 0.7083        | Common Variant    | 0.76719      | MAP3K1   | c.2227G>A   | p.V743I   | Missense          |
| chr5   | 112162854 | rs2229992   | COSM1432175 | T   | C   | 0.51          | Common Variant    | 0.83456      | APC      | c.1458T>C   | p.Y486Y   | coding silent     |
| chr5   | 112176559 | rs866006    | COSM6475354 | T   | G   | 0.333         | Common Variant    | 0.71742      | APC      | c.5268T>G   | p.S1756S  | coding silent     |
| chr7   | 55249063  | rs1050171   | COSM1451600 | G   | A   | 0.4327        | Common Variant    | 0.95009      | EGFR     | c.2361G>A   | p.Q787Q   | coding silent     |
| chr7   | 116340262 | rs33917957  | COSM5020653 | A   | G   | 0.0329        | Common Variant    | 0.86365      | MET      | c.1124A>G   | p.N375S   | Missense          |
| chr7   | 128845511 | rs111694017 | COSM1738148 | G   | A   | 0.0024        | Common Variant    | 0.90625      | SMO      | c.808G>A    | p.V270I   | Missense          |
| chr7   | 138556013 | rs776449063 | COSM5434577 | G   | A   | 0.00022(ExAC) | NOT Common        | 0.84266      | KIAA1549 | c.4441C>T   | p.R1481W  | Missense          |
| chr8   | 69020496  | rs4260880   | COSM3763384 | T   | C   | 0.4798        | Common Variant    | 0.85007      | PREX2    | c.2868T>C   | p.S956S   | coding silent     |
| chr9   | 117846570 | rs2274836   | COSM3763575 | C   | T   | 0.4641        | Common Variant    | 0.72876      | TNC      | c.2049G>A   | p.E683E   | coding silent     |
| chr9   | 135985796 | rs3761824   | COSM4163477 | C   | T   | 0.2486        | Common Variant    | 0.97073      | RALGDS   | c.372G>A    | p.V124V   | coding silent     |
| chr11  | 102201848 | rs17878663  | COSM3998183 | G   | A   | 0.0699        | Common Variant    | 0.70352      | BIRC3    | c.1200G>A   | p.Q400Q   | coding silent     |
| chr12  | 25362777  | rs1137282   | COSM3753105 | A   | G   | 0.1755        | Common Variant    | 0.76767      | KRAS     | c.519T>C    | p.D173D   | coding silent     |
| chr12  | 121416650 | rs1169288   | COSM430522  | A   | C   | 0.2985        | Common Variant    | 0.91018      | HNF1A    | c.79A>C     | p.I27L    | Missense          |
| chr12  | 121435342 | rs2259820   | COSM3931546 | C   | T   | 0.3167        | Common Variant    | 0.9731       | HNF1A    | c.1375C>T   | p.L459L   | coding silent     |
| chr12  | 121435427 | rs2464196   | COSM4984989 | G   | A   | 0.3177        | Common Variant    | 0.82717      | HNF1A    | c.1460G>A   | p.S487N   | Missense          |
| chr13  | 21562948  | rs558614    | COSM432208  | G   | A   | 0.3704        | Common Variant    | 0.96847      | LATS2    | c.971C>T    | p.A324V   | Missense          |
| chr13  | 28624294  | rs1933437   | COSM5019176 | G   | A   | 0.5587        | Common Variant    | 0.92594      | FLT3     | c.680C>T    | p.T227M   | Missense          |
| chr14  | 38061742  | rs7144658   | COSM3753953 | C   | T   | 0.417         | Common Variant    | 0.83972      | FOXA1    | c.247G>A    | p.A83T    | Missense          |
| chr14  | 105239894 | rs1130233   | COSM3765730 | C   | T   | 0.3225        | Common Variant    | 0.71625      | AKT1     | c.726G>A    | p.E242E   | coding silent     |
| chr16  | 9943666   | rs2229193   | COSM3999994 | C   | T   | 0.2258        | Common Variant    | 0.73792      | GRIN2A   | c.1275G>A   | p.L425L   | coding silent     |
| chr19  | 42799049  | rs1052023   | COSM3756833 | C   | T   | 0.1198        | Common Variant    | 0.78474      | CIC      | c.4533C>T   | p.I1511I  | coding silent     |
| chr20  | 40714479  | rs2016647   | COSM3758574 | G   | A   | 0.144         | Common Variant    | 0.91263      | PTPRT    | c.3927C>T   | p.Y1309Y  | coding silent     |
| chrX   | 44938563  | rs20539     | COSM1179848 | G   | A   | 0.2217        | Common Variant    | 0.88609      | KDM6A    | c.3111G>A   | p.Q1037Q  | coding silent     |
| chrX   | 153629155 | rs4909      | COSM4590446 | A   | G   | 0.6689        | Common Variant    | 0.81036      | RPL10    | c.605A>G    | p.N202S   | Missense          |

Highlighted in grey: genes with SNV non-common to population

**Supplemental Table S4B. HS980 (p22) Germline SNV overlapping to Bailey MH et al, Cancer Driver Genes.**

# HS980 p22 Germline SNVs common to three replicates

# SNVs reported in COSMIC database (Catalog of Somatic Mutation in Cancer - release v83; Coding; 07-11-2017)

# SNVs with "FATHMM" prediction as "Pathogenic"

# SNVs within Cancer Driver Genes (Bailey MH et al.; Cell-2018; PMID: 29625053).

# GMAF = Global Minor Allele Frequency

# Common Variant (minor allele frequency (GMAF) of  $\geq 0.01$  in at least one 1000 Genomes Phase III major population)

| Chr_No | Position  | dbSNP_rs-ID | COSMIC-ID   | REF | ALT | GMAF   | Population Status | FATHMM Score | Gene-ID | BASE Change | AA Change | Substitution Type |
|--------|-----------|-------------|-------------|-----|-----|--------|-------------------|--------------|---------|-------------|-----------|-------------------|
| chr2   | 29416481  | rs1881420   | COSM1130802 | T   | C   | 0.4151 | Common Variant    | 0.92214      | ALK     | c.4472A>G   | p.K1491R  | Missense          |
| chr2   | 29940529  | rs2246745   | COSM4416269 | A   | T   | 0.411  | Common Variant    | 0.9054       | ALK     | c.702T>A    | p.P234P   | coding silent     |
| chr2   | 212587119 | rs77309171  | COSM4583147 | T   | C   | 0.002  | Common Variant    | 0.86171      | ERBB4   | c.882A>G    | p.P294P   | coding silent     |
| chr3   | 37053568  | rs1799977   | COSM1131469 | A   | G   | 0.1296 | Common Variant    | 0.80196      | MLH1    | c.655A>G    | p.I219V   | Missense          |
| chr4   | 55152040  | rs2228230   | COSM22413   | C   | T   | 0.2404 | Common Variant    | 0.88315      | PDGFRA  | c.2472C>T   | p.V824V   | coding silent     |
| chr4   | 187630590 | rs3733415   | COSM4416272 | G   | A   | 0.2614 | Common Variant    | 0.95514      | FAT1    | c.392C>T    | p.A131V   | Missense          |
| chr5   | 112162854 | rs2229992   | COSM1432175 | T   | C   | 0.51   | Common Variant    | 0.83456      | APC     | c.1458T>C   | p.Y486Y   | coding silent     |
| chr5   | 56177443  | rs702689    | COSM4003565 | G   | A   | 0.4764 | Common Variant    | 0.98239      | MAP3K1  | c.1927G>A   | p.D643N   | Missense          |
| chr5   | 56177743  | rs832582    | COSM4416191 | G   | A   | 0.7083 | Common Variant    | 0.76719      | MAP3K1  | c.2227G>A   | p.V743I   | Missense          |
| chr5   | 112176559 | rs866006    | COSM6475354 | T   | G   | 0.333  | Common Variant    | 0.71742      | APC     | c.5268T>G   | p.S1756S  | coding silent     |
| chr7   | 55249063  | rs1050171   | COSM1451600 | G   | A   | 0.4327 | Common Variant    | 0.95009      | EGFR    | c.2361G>A   | p.Q787Q   | coding silent     |
| chr7   | 116340262 | rs33917957  | COSM5020653 | A   | G   | 0.0329 | Common Variant    | 0.86365      | MET     | c.1124A>G   | p.N375S   | Missense          |
| chr12  | 25362777  | rs1137282   | COSM3753105 | A   | G   | 0.1755 | Common Variant    | 0.76767      | KRAS    | c.519T>C    | p.D173D   | coding silent     |
| chr13  | 21562948  | rs558614    | COSM432208  | G   | A   | 0.37   | Common Variant    | 0.96847      | LATS2   | c.971C>T    | p.A324V   | Missense          |
| chr13  | 28624294  | rs1933437   | COSM5019176 | G   | A   | 0.5587 | Common Variant    | 0.92594      | FLT3    | c.680C>T    | p.T227M   | Missense          |
| chr14  | 38061742  | rs7144658   | COSM3753953 | C   | T   | 0.417  | Common Variant    | 0.83972      | FOXA1   | c.247G>A    | p.A83T    | Missense          |
| chr14  | 105239894 | rs1130233   | COSM3765730 | C   | T   | 0.3225 | Common Variant    | 0.71625      | AKT1    | c.726G>A    | p.E242E   | coding silent     |
| chr19  | 42799049  | rs1052023   | COSM3756833 | C   | T   | 0.1198 | Common Variant    | 0.78474      | CIC     | c.4533C>T   | p.I1511I  | coding silent     |
| chrX   | 44938563  | rs20539     | COSM1179848 | G   | A   | 0.2217 | Common Variant    | 0.88609      | KDM6A   | c.3111G>A   | p.Q1037Q  | coding silent     |
| chrX   | 32380996  | rs1801187   | COSM4999535 | C   | T   | 0.4652 | Common Variant    | 0.96068      | DMD     | c.1211G>A   | p.R404H   | Missense          |

### Supplemental Table S4C. HS980 (p22) Germline SNV overlapping to Shibata Cancer Driver Genes.

# HS980 p22 Germline SNVs common to three replicates.

# SNVs reported in COSMIC database (Catalog of Somatic Mutation in Cancer - release v83; Coding; 07-11-2017)

# SNVs with "FATHMM" prediction as "Pathogenic"

# SNVs within Cancer Driver Genes (Shibata Cancer driver gene list based on an article (Cancer Research 72:636-644, 2012)).

# GMAF = Global Minor Allele Frequency

# Common Variant (minor allele frequency (GMAF) of  $\geq 0.01$  in at least one 1000 Genomes Phase III major population)

| Chr_No | Position  | dbSNP_rs-ID | COSMIC-ID   | REF | ALT | GMAF   | Population Status | FATHMM SCORE | Gene-ID | BASE CHANGE | AA CHANGE | Substitution Type |
|--------|-----------|-------------|-------------|-----|-----|--------|-------------------|--------------|---------|-------------|-----------|-------------------|
| chr2   | 29416481  | rs1881420   | COSM1130802 | T   | C   | 0.4151 | Common Variant    | 0.92214      | ALK     | c.4472A>G   | p.K1491R  | Missense          |
| chr2   | 29940529  | rs2246745   | COSM4416269 | A   | T   | 0.411  | Common Variant    | 0.9054       | ALK     | c.702T>A    | p.P234P   | Coding silent     |
| chr3   | 37053568  | rs1799977   | COSM1131469 | A   | G   | 0.1296 | Common Variant    | 0.80196      | MLH1    | c.655A>G    | p.I219V   | Missense          |
| chr4   | 55979558  | rs2305948   | COSM1131107 | C   | T   | 0.1526 | Common Variant    | 0.96877      | KDR     | c.889G>A    | p.V297I   | Missense          |
| chr4   | 55152040  | rs2228230   | COSM22413   | C   | T   | 0.2404 | Common Variant    | 0.88315      | PDGFRA  | c.2472C>T   | p.V824V   | Coding silent     |
| chr5   | 112162854 | rs2229992   | COSM1432175 | T   | C   | 0.51   | Common Variant    | 0.83456      | APC     | c.1458T>C   | p.Y486Y   | Coding silent     |
| chr5   | 112176559 | rs866006    | COSM6475354 | T   | G   | 0.333  | Common Variant    | 0.71742      | APC     | c.5268T>G   | p.S1756S  | Coding silent     |
| chr7   | 55249063  | rs1050171   | COSM1451600 | G   | A   | 0.4327 | Common Variant    | 0.95009      | EGFR    | c.2361G>A   | p.Q787Q   | Coding silent     |
| chr7   | 128845511 | rs111694017 | COSM1738148 | G   | A   | 0.0024 | Common Variant    | 0.90625      | SMO     | c.808G>A    | p.V270I   | Missense          |
| chr7   | 116340262 | rs33917957  | COSM5020653 | A   | G   | 0.0329 | Common Variant    | 0.86365      | MET     | c.1124A>G   | p.N375S   | Missense          |
| chr12  | 25362777  | rs1137282   | COSM3753105 | A   | G   | 0.1755 | Common Variant    | 0.76767      | KRAS    | c.519T>C    | p.D173D   | Coding silent     |
| chr12  | 121435342 | rs2259820   | COSM3931546 | C   | T   | 0.3167 | Common Variant    | 0.9731       | HNF1A   | c.1375C>T   | p.L459L   | Coding silent     |
| chr12  | 121416650 | rs1169288   | COSM430522  | A   | C   | 0.2985 | Common Variant    | 0.91018      | HNF1A   | c.79A>C     | p.I27L    | Missense          |
| chr12  | 121435427 | rs2464196   | COSM4984989 | G   | A   | 0.3177 | Common Variant    | 0.82717      | HNF1A   | c.1460G>A   | p.S487N   | Missense          |
| chr13  | 28624294  | rs1933437   | COSM5019176 | G   | A   | 0.5587 | Common Variant    | 0.92594      | FLT3    | c.680C>T    | p.T227M   | Missense          |
| chr14  | 105239894 | rs1130233   | COSM3765730 | C   | T   | 0.3225 | Common Variant    | 0.71625      | AKT1    | c.726G>A    | p.E242E   | Coding silent     |
| chr19  | 42799049  | rs1052023   | COSM3756833 | C   | T   | 0.1198 | Common Variant    | 0.78474      | CIC     | c.4533C>T   | p.I1511I  | Coding silent     |
| chrX   | 44938563  | rs20539     | COSM1179848 | G   | A   | 0.2217 | Common Variant    | 0.88609      | KDM6A   | c.3111G>A   | p.Q1037Q  | Coding silent     |

**Supplemental Table S5. Exonic and Spliced somatic SNVs for hESC-RPE samples compared with respective HS980 (p22) samples.**

- # Somatic SNVs Identified using GATK-MuTect2 (HS980 p22 vs RPE)
- # Combined Non-redundant SNVs (replicate-1, 2 & 3)
- # ANNOVAR annotation of SNVs
- # SNVs with Missence, Frameshift and Silent mutation annotation
- # Average Expression (RPKM) of gene from single-cell experiment (hES cells & RPE cells)

| Chr_No | Start     | End       | Ref  | Alt | dbSNP_rs-ID | Gene-ID   | Annotation          | Amino Acid Change         | Avg. Exp. hESC | Avg. Exp. RPE |
|--------|-----------|-----------|------|-----|-------------|-----------|---------------------|---------------------------|----------------|---------------|
| chr1   | 17086940  | 17086941  | AC   | -   | rs748266310 | MST1L     | Frameshift Deletion | c.383_384del:p.128_128del | 0.80           | 0.03          |
| chr11  | 56143716  | 56143719  | TGTT | -   | rs760647141 | OR8U1     | Frameshift Deletion | c.617_620del:p.206_207del | 0.00           | 0.00          |
| chr1   | 145349584 | 145349584 | T    | A   | rs370191373 | NBPF10    | Non-synonymous      | c.T6999A:p.D2333E,        | 0.03           | 1.14          |
| chr1   | 152186042 | 152186042 | A    | G   | rs12751022  | HRNR      | Non-synonymous      | c.T8063C:p.L2688S         | 0.05           | 0.01          |
| chr12  | 10588530  | 10588530  | C    | G   | rs34195537  | KLRC2     | Non-synonymous      | c.G56C:p.R19P             | 0.00           | 0.00          |
| chr16  | 21623970  | 21623970  | A    | T   | .           | METTL9    | Non-synonymous      | c.A170T:p.Y57F            | 73.69          | 114.00        |
| chr19  | 54745682  | 54745682  | C    | T   | rs111666280 | LILRA6    | Non-synonymous      | c.G419A:p.R140Q           | 0.00           | 0.00          |
| chr2   | 113147370 | 113147370 | G    | A   | rs202082997 | RGPD5     | Non-synonymous      | c.C3152T:p.T1051I         | 0.00           | 0.00          |
| chr22  | 24579049  | 24579049  | G    | A   | rs35660748  | SUSD2     | Non-synonymous      | c.G101A:p.R34H            | 0.24           | 0.80          |
| chr3   | 47030858  | 47030858  | C    | T   | rs764816462 | NBEAL2    | Non-synonymous      | c.C460T:p.R154C           | 0.00           | 0.14          |
| chr6   | 30954694  | 30954694  | C    | A   | rs112415706 | MUC21     | Non-synonymous      | c.C742A:p.P248T           | 0.00           | 0.00          |
| chr7   | 100639618 | 100639618 | C    | T   | rs111933539 | MUC12     | Non-synonymous      | c.C5774T:p.T1925M         | 0.14           | 0.07          |
| chrX   | 57618621  | 57618621  | T    | C   | rs113289397 | ZXDB      | Non-synonymous      | c.T140C:p.L47P            | 1.46           | 2.16          |
| chr1   | 201180222 | 201180222 | G    | A   | rs28465285  | IGFN1     | Synonymous          | c.G6201A:p.E2067E         | 0.00           | 0.02          |
| chr11  | 1092684   | 1092684   | C    | T   | rs201269049 | MUC2      | Synonymous          | c.C4503T:p.S1501S         | 0.00           | 3.88          |
| chr11  | 117077034 | 117077034 | A    | G   | rs28590104  | PCSK7     | Synonymous          | c.T2037C:p.T679T          | 6.60           | 4.13          |
| chr17  | 15539560  | 15539560  | C    | T   | rs9911397   | TRIM16    | Synonymous          | c.G639A:p.A213A           | 0.89           | 4.66          |
| chr17  | 39197593  | 39197593  | G    | T   | rs145621540 | KRTAP1-1  | Synonymous          | c.C57A:p.T19T             | 0.00           | 0.00          |
| chr18  | 14542867  | 14542867  | C    | T   | rs200779556 | POTEC     | Synonymous          | c.G279A:p.T93T            | 0.00           | 0.00          |
| chr20  | 60904081  | 60904081  | G    | A   | rs544096167 | LAMA5     | Synonymous          | c.C4266T:p.N1422N         | 4.91           | 11.93         |
| chr4   | 367291    | 367291    | T    | C   | .           | ZNF141    | Synonymous          | c.T1065C:p.N355N          | 17.45          | 17.16         |
| chr9   | 43628651  | 43628651  | A    | C   | rs2261119   | SPATA31A6 | Synonymous          | c.T291G:p.L97L            | 0.00           | 0.00          |
| chrX   | 140785790 | 140785790 | T    | C   | rs139363903 | SPANXD    | Synonymous          | c.A126G:p.L42L            | 0.00           | 0.00          |
| chr1   | 16890602  | 16890602  | T    | G   | rs2990551   | NBPF1     | Unknown             | UNKNOWN                   | 0.34           | 2.32          |
| chr1   | 148017582 | 148017582 | A    | C   | rs879951427 | NBPF8     | Unknown             | UNKNOWN                   | 0.05           | 2.86          |

Highlighted in grey: genes with some clinical relevance reported in COSMIC/ClinVar



**Supplemental Table S6. Exonic and Spliced somatic SNVs for HS980 (p38) samples compared with respective HS980 (p22) samples.**

# Somatic SNVs Identified using GATK-MuTect2 (HS980 p22 vs HS980 (p38))

# Combined Non-redundant SNVs (replicate-1, 2 & 3)

# ANNOVAR annotation of SNVs

# SNVs with Missence, Frameshift and Silent mutation annotation

# Average Expression (RPKM) of gene from single-cell experiment (hES cells)

| Chr   | Start     | End       | Ref | Alt  | dbSNP_rs-ID | Gene-ID      | Annotation           | Amino Acid Change         | Avg. Expression (hESc) |
|-------|-----------|-----------|-----|------|-------------|--------------|----------------------|---------------------------|------------------------|
| chr1  | 17086940  | 17086941  | AC  | -    | rs748266310 | MST1L        | Frameshift Deletion  | c.383_384del:p.128_128del | 0.80                   |
| chr1  | 229738614 | 229738615 | AA  | -    | .           | TAF5L        | Frameshift Deletion  | c.299_300del:p.100_100del | 1.30                   |
| chr8  | 143958453 | 143958453 | -   | GGAA | .           | CYP11B1      | Frameshift Insertion | c.580_581insTTCC:p.H194fs | 0.00                   |
| chr1  | 145349584 | 145349584 | T   | A    | rs370191373 | NBPF10       | Non-synonymous       | c.T6999A:p.D2333E         | 0.03                   |
| chr11 | 1018012   | 1018012   | T   | G    | rs10751676  | MUC6         | Non-synonymous       | c.A4789C:p.K1597Q         | 0.00                   |
| chr14 | 105417313 | 105417313 | T   | C    | rs80275639  | AHNAK2       | Non-synonymous       | c.A4475G:p.K1492R         | 0.98                   |
| chr15 | 82635194  | 82635194  | T   | C    | rs1610794   | GOLGA6L10    | Non-synonymous       | c.A1376G:p.E459G          | 0.00                   |
| chr18 | 14542791  | 14542791  | C   | T    | rs201849570 | POTEC        | Non-synonymous       | c.G355A:p.A119T           | 0.00                   |
| chr19 | 4511746   | 4511746   | A   | T    | rs62115192  | PLIN4        | Non-synonymous       | c.T2184A:p.N728K          | 0.16                   |
| chr19 | 54745682  | 54745682  | C   | T    | rs111666280 | LILRA6       | Non-synonymous       | c.G419A:p.R140Q           | 0.00                   |
| chr2  | 113147370 | 113147370 | G   | A    | rs202082997 | RGPD5, RGPD8 | Non-synonymous       | c.C3152T:p.T1051I         | 0.00                   |
| chr20 | 30231249  | 30231249  | G   | C    | .           | COX4I2       | Non-synonymous       | c.G290C:p.R97P            | 0.72                   |
| chr21 | 45994014  | 45994014  | C   | T    | rs13051603  | KRTAP10-4    | Non-synonymous       | c.C379T:p.P127S           | 0.00                   |
| chr5  | 79747478  | 79747478  | C   | A    | .           | ZFYVE16      | Non-synonymous       | c.C3557A:p.A1186E         | 7.01                   |
| chr6  | 17602910  | 17602910  | G   | A    | rs144013791 | FAM8A1       | Non-synonymous       | c.G802A:p.V268I           | 2.11                   |
| chr6  | 32549402  | 32549402  | C   | T    | rs3205588   | HLA-DRB1     | Non-synonymous       | c.G584A:p.R195Q           | 0.00                   |
| chr7  | 75124676  | 75124676  | G   | A    | rs28422159  | SPDYE5       | Non-synonymous       | c.G242A:p.G81D            | 0.11                   |
| chr7  | 100645807 | 100645807 | G   | A    | rs112404953 | MUC12        | Non-synonymous       | c.G11963A:p.G3988D        | 0.14                   |
| chr9  | 43915893  | 43915893  | G   | C    | rs200215881 | CNTNAP3B     | Non-synonymous       | c.G3741C:p.M1247I         | 0.15                   |
| chr11 | 1643096   | 1643096   | G   | A    | rs59587741  | KRTAP5-4     | Synonymous           | c.C228T:p.G76G            | 0.00                   |
| chr11 | 62296299  | 62296299  | G   | A    | .           | AHNAK        | Synonymous           | c.C5590T:p.L1864L         | 0.98                   |
| chr11 | 117077034 | 117077034 | A   | G    | rs28590104  | PCSK7        | Synonymous           | c.T2037C:p.T679T          | 6.60                   |
| chr12 | 125397475 | 125397475 | C   | A    | rs11537760  | UBC          | Synonymous           | c.G843T:p.G281G           | 134.65                 |
| chr18 | 14542867  | 14542867  | C   | T    | rs200779556 | POTEC        | Synonymous           | c.G279A:p.T93T            | 0.00                   |
| chr19 | 1881263   | 1881263   | G   | A    | .           | ABHD17A      | Synonymous           | c.C303T:p.C101C           | 0.44                   |
| chr2  | 234358746 | 234358746 | C   | T    | rs754569132 | DGKD         | Synonymous           | c.C2007T:p.F669F          | 1.90                   |
| chr20 | 60904081  | 60904081  | G   | A    | rs544096167 | LAMA5        | Synonymous           | c.C4266T:p.N1422N         | 4.91                   |
| chr3  | 195452689 | 195452689 | C   | T    | rs141077164 | MUC20        | Synonymous           | c.C702T:p.D234D           | 0.00                   |
| chr3  | 195508986 | 195508986 | G   | A    | rs2948679   | MUC4         | Synonymous           | c.C9465T:p.V3155V         | 0.00                   |
| chr6  | 31964664  | 31964664  | G   | A    | rs12526327  | C4A,C4B      | Synonymous           | c.G3735A:p.P1245P         | 0.00                   |
| chr12 | 40880507  | 40880507  | A   | G    | .           | MUC19        | Unknown              | UNKNOWN                   | 0.02                   |
| chr7  | 26246132  | 26246132  | T   | G    | .           | CBX3         | Splicing             | exon3:c.167+2T>G          | 84.05                  |

Highlighted in grey: genes with some clinical relevance reported in COSMIC/ClinVar

**Supplemental Table S7. Clinical significance analysis of 11 normal participants from personal genome project UK.**

| <b>Sample-ID</b>                              | <b>A</b> | <b>B</b> | <b>C</b> | <b>D</b> | <b>E</b> | <b>F</b> | <b>G</b> | <b>H</b> |
|-----------------------------------------------|----------|----------|----------|----------|----------|----------|----------|----------|
| <b>HS980 (p22) common to three replicates</b> | 4355521  | 2.05     | 20       | 20       | 2160     | 35/34    | 20/20    | 18/18    |
| <b>01_uk35C650</b>                            | 4105831  | 2.07     | 28       | 27       | 2102     | 33/32    | 30/29    | 15/15    |
| <b>02_uk2E2AAE</b>                            | 4133496  | 2.07     | 24       | 24       | 2039     | 31/31    | 19/19    | 18/18    |
| <b>03_uk2DF242</b>                            | 4128205  | 2.06     | 23       | 21       | 2026     | 31/31    | 21/21    | 21/20    |
| <b>04_uk740176</b>                            | 4248904  | 2.07     | 31       | 30       | 2084     | 29/28    | 18/17    | 12/11    |
| <b>05_uk33D02F</b>                            | 4188095  | 2.07     | 24       | 22       | 2109     | 25/25    | 17/16    | 12/12    |
| <b>06_uk0C72FF</b>                            | 4112224  | 2.07     | 24       | 24       | 2069     | 40/39    | 28/28    | 18/17    |
| <b>07_uk1097F9</b>                            | 4137176  | 2.07     | 18       | 16       | 2150     | 30/29    | 18/17    | 11/10    |
| <b>08_uk174659</b>                            | 4175392  | 2.06     | 16       | 14       | 2067     | 46/45    | 29/29    | 24/24    |
| <b>09_uk85AA3B</b>                            | 4179265  | 2.06     | 25       | 23       | 2049     | 28/28    | 21/21    | 15/15    |
| <b>10_uk481F67</b>                            | 4901623  | 2.07     | 28       | 28       | 1794     | 44/42    | 27/26    | 14/13    |
| <b>11_uk4CA868</b>                            | 3897315  | 2.07     | 23       | 22       | 2072     | 38/37    | 24/23    | 21/20    |

- A: Total Germline SNVs
- B: Transitions/Transversions (ts/tv)
- C: SNVs with clinical significance (CLNID) as “Pathogenic” in ClinVar-20171029 database release
- D: ClinVar annotated “Pathogenic” SNVs reported as COMMON in dbSNP (minor allele frequency (MAF) of  $\geq 0.01$  in at least one 1000 Genomes Phase III major population with at least two individuals from different families having the same minor allele)
- E: SNVs with FATHMM prediction as “Pathogenic” in COSMIC (COSMIC Coding v-83) database
- F: COSMIC annotated “Pathogenic” SNVs within COSMIC Cancer Gene Census / SNVs COMMON in dbSNP
- G: COSMIC annotated “Pathogenic” SNVs within Bailey MH et al. Cancer Driver Genes / SNVs COMMON in dbSNP
- H: COSMIC annotated “Pathogenic” SNVs within Shibata Cancer Driver Genes / SNVs COMMON in dbSNP
